# Supplementary material for: A MOF-derived nickel based N-doped mesoporous carbon catalyst with high catalytic activity for the reduction of nitroarenes
Source: Royal Society of Chemistry journal article supplement (doi:10.1039/c5ra23082a), 2016-01-01
Supplement: c5ra23082a1.pdf [file c5ra23082a1.pdf]

MOFs derived nickel based N-doped mesoporous carbon catalyst with  
high catalytic activity for the reduction of nitroarenes

Wei Zuo, Guiqin Yu, Zhengping Dong\*

*College of Chemistry and Chemical Engineering, Gansu Provincial  
Engineering Laboratory for Chemical Catalysis, Lanzhou University,  
Lanzhou 730000, PR China. E-mail: [dongzhp@lzu.edu.cn](mailto:dongzhp@lzu.edu.cn);*

*Fax: +86 0931 8912582; Tel: +86 0931 8912577.*

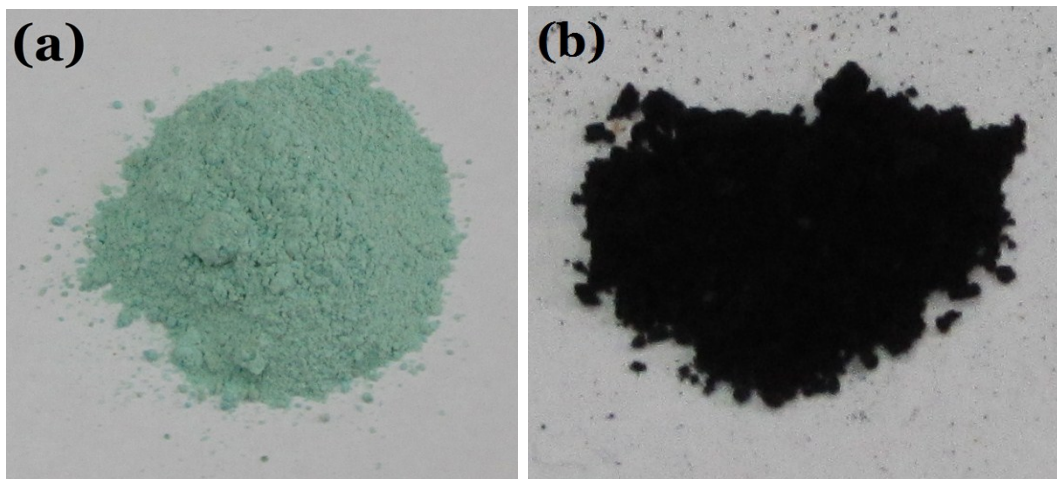

**Fig. S1.** Photographs of (a) Ni-MOFs (blue powder), (b) Ni/m-CN (black powder).

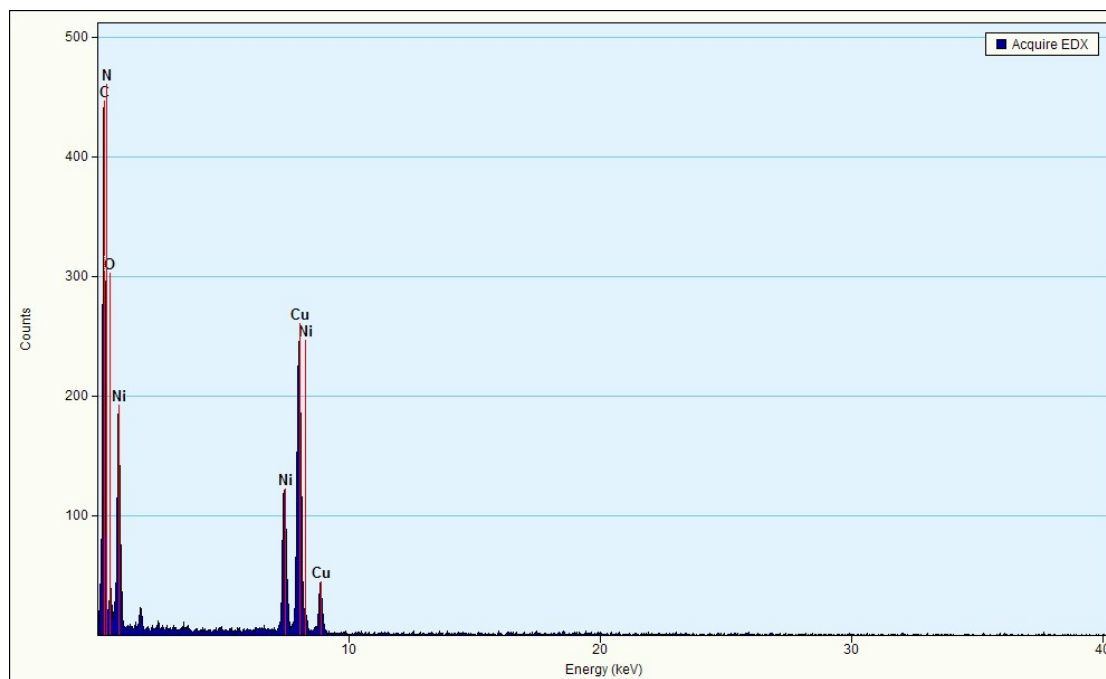

**Fig. S2.** EDS spectra of Ni/m-CN.

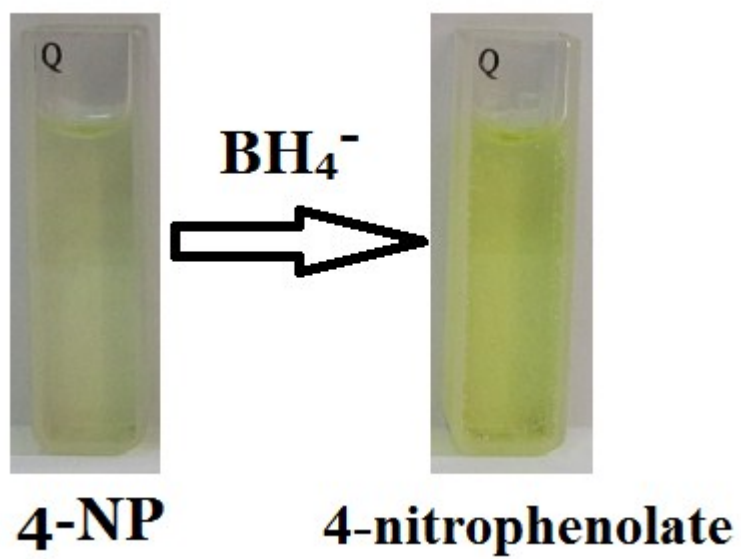

**Fig. S3.** The color change of 4-NP solution before and after adding  $\text{NaBH}_4$ .

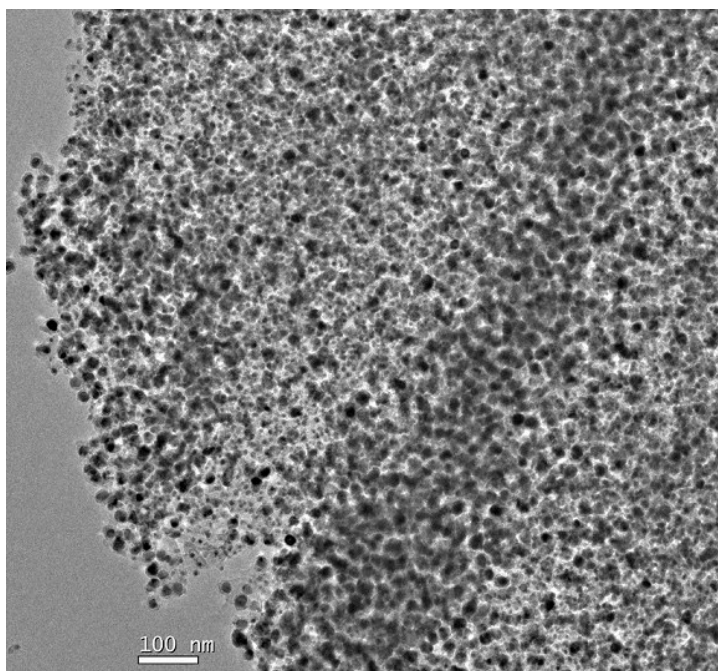

**Fig. S4.** The TEM image of the Ni/m-CN nanocatalyst used after six cycles.

**Table S1.** The physiochemical parameters of the Ni/m-CN nanocatalyst.

| <i>Samples</i> | $S_{BET}$ (m <sup>2</sup> g <sup>-1</sup> ) | $V_{pore}$<br>(cm <sup>3</sup> g <sup>-1</sup> ) | $D_{pore}$<br>(nm) | N<br>(wt%) | Ni<br>(wt%) |
|----------------|---------------------------------------------|--------------------------------------------------|--------------------|------------|-------------|
| Ni/m-CN        | 134                                         | 0.35                                             | 10.8               | 1.54       | 48.3        |
